# Supplementary material for: Original Basic Activation for Enhancing Silica Particle Reactivity: Characterization by Liquid Phase Silanization and Silica-Rubber Nanocomposite Properties
Source: MDPI journal article supplement (doi:10.3390/polym14091676), 2022-04-20
Supplement: s1 [file s1]

# Original basic activation for enhancing silica particles reactivity: characterization by liquid phase silanization and silica-rubber nanocomposite properties

Enzo Moretto<sup>1</sup>, Chuanyu Yan<sup>1</sup>, Reiner Dieden<sup>1</sup>, Pascal Steiner<sup>2</sup>, Benoît Duez<sup>2</sup>, Damien Lenoble<sup>1</sup>, Jean-Sébastien Thomann<sup>1, \*</sup>

<sup>1</sup> MRT Department, Luxembourg Institute of Science and Technology, 41 Rue du Brill, Belvaux, L-4422 Luxembourg, Luxembourg; enzo.moretto@list.lu (E.M.), chuanyu.yan@list.lu (C.Y.), reiner.dieden@list.lu (R.D.), damien.lenoble@list.lu (D.L.)

<sup>2</sup> Goodyear S.A, Avenue Gordon Smith, Colmar-Berg, L-7750 Luxembourg, Luxembourg; benoit\_duez@goodyear.com (B.D.); pascal\_steiner@goodyear.com (P.S.)

\* Correspondence: jean-sebastien.thomann@list.lu (J.-S.T.)

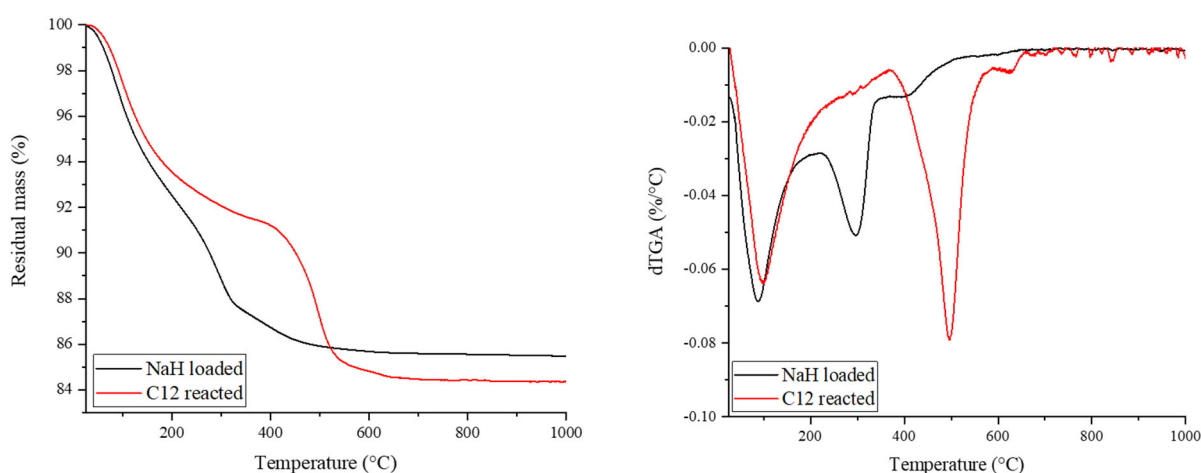

Figure S1 – Thermogram (left) and dTGA (right) curves of NaH activated silica (black) and NaH-C12 reacted silica (red)

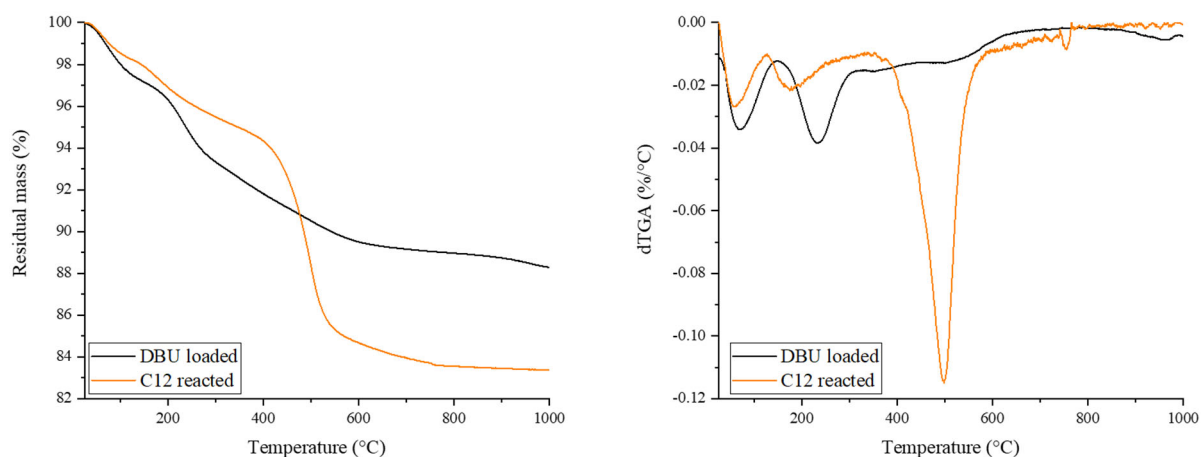

Figure S2 – Thermogram (left) and dTGA (right) curves of DBU-activated silica (black) and DBU-C12 reacted silica (orange)

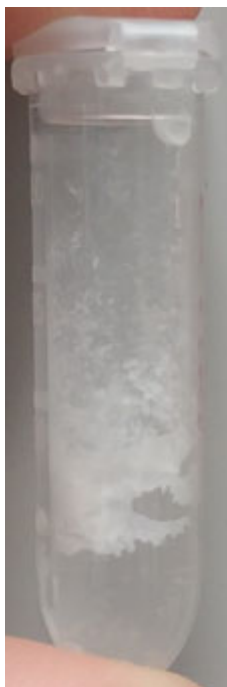

Figure S3 – Photograph of the white residual film after reaction of C12 silane with CsF/DCl/D<sub>2</sub>O solution
